# Supplementary material for: Machine learning-driven time series analysis for SOH prediction of lithium-ion batteries
Source: Research Square preprint supplement (doi:10.21203/rs.3.rs-6310092/v1), 2025-04-15
Supplement: Supplementary file 1 [file b37172bac77c351dfcfe5c21.docx]

**Machine learning-driven time series analysis for SOH prediction of lithium-ion batteries**

Yunlong Zhang a, b, c, *, Xiaolei Bi a, b, c, Shiqiang Wang a, b, c, Bin Tao a, b, c

a. State Key Laboratory of Chemical Safety, Qingdao, 266000, Shandong, China

b. SINOPEC Research Institute of Safety Engineering Co., Ltd. Qingdao, 266000, Shandong, China

c. National Registration Center for Chemicals, Ministry of Emergency Management, Qingdao, 266000, Shandong, China

Contents:

Section 1. Lithium-ion battery SOH determination method.

Section 2. The specific functions and effects of the three gating mechanisms of LSTM model.

Section 3. Model evaluation indicators.

Figure S1. 200Ah battery cell cycle capacity decay.

**Section 1 Lithium-ion battery SOH determination method.**

This study employs a battery management system algorithm based on battery efficiency during charging and discharging processes. The algorithm encompasses the calculation of battery efficiency, state of charge (SOC), and state of health (SOH). Additionally, it integrates the open-circuit voltage method (OCV) and the Coulomb counting method (CCM) to mitigate error accumulation in scenarios where initial values are unknown, thereby enhancing the accuracy of battery aging state estimation [1].

Firstly, the charging and discharging current of the battery is calculated using Equation (1):

（1）

Where represents the charging and discharging current, denotes the battery capacity and *t* indicates the charging or discharging time.

Subsequently, the relationship between increased internal resistance due to battery aging and battery efficiency in the battery management system is clarified. The reduction in battery efficiency can be represented as an increase in internal resistance [2]. Accordingly, the efficiency loss can be calculated based on the charging and discharging current, battery voltage, and internal resistance using Equation (2):

（2）

Where represents the efficiency loss of the battery, denotes the battery voltage and *R* is the internal resistance of the battery. By substituting Equation (1), the efficiency loss formula for aged batteries, given by Equation (3) and the internal resistance calculation formula, represented by Equation (4):

（3）

（4）

Subsequently, based on Equation (5), the current battery efficiency can be obtained:

（5）

Using the above equations, the changes in battery internal resistance and the efficiency loss caused by cyclic charging and discharging can be estimated. To enhance the accuracy of state of charge (SOC) estimation, the battery efficiency is integrated with the OCV and the CCM method. This approach improves the initial value estimation for CCM, mitigating the risk of cumulative errors caused by unknown initial values and ensuring greater precision in SOC estimation.

Firstly, the OCV method is employed to directly measure the potential difference between the positive and negative electrodes of the battery in a static state. The measured results are then substituted into the internal resistance equation derived from Equation (4) to obtain the formula for calculating the SOC of the battery:

（6）

Where represents the initial SOC of the battery, denotes the open-circuit voltage of the battery.

By applying the internal resistance derived from the battery efficiency calculation formula to the traditional CCM method, a refined battery SOC calculation formula is obtained, enhancing the accuracy of battery state prediction during charging and discharging processes:

（7）

Where represents the state of charge of the battery at any given time *t*. denotes the initial state of charge and is the capacity of the battery.

After completing the charging and discharging process, the SOC is derived using Equations (6) and (7). By rearranging the calculation formula based on *t*, Equation (8) is obtained:

（8）

Where represents the constant-current charging time of the battery following the charging and discharging cycle process.

Subsequently, the internal resistance calculation formula derived from the battery efficiency formula (Equation 4) is applied. By using Equation (9) to compare the constant-current charging time values following the charging and discharging cycle process, the battery' SOH can be predicted based on its characteristics:

（9）

Where represents the state of health of the battery after the charging and discharging cycle and denotes the constant-current charging time of the battery before the charging and discharging cycle.

The change in the battery's SOH due to losses during the charging and discharging cycle can be determined using Equation (10):

（10）

**Section 2 The specific functions and effects of the three gating mechanisms of LSTM model.**

The Long Short-Term Memory (LSTM) neural network is composed of a series of identical LSTM units. Each unit consists of three gate structures: the forget gate (​), the input gate (), and the output gate (). These gates dynamically adjust the network's ability to control how much historical sequence information is learned, how much is forgotten, and how much is retained, thereby addressing the issues of gradient explosion and vanishing in traditional Recurrent Neural Networks (RNNs) [3].

The forget gate determines how much information from the previous hidden state is retained in the current timestep. Based on the previous hidden state and the current input, the forget gate computes a value between 0 and 1, which is applied to the cell state of the previous timestep. A value of 1 indicates complete retention, while a value of 0 signifies complete forgetting. This mechanism governs the retention or discarding of information. The calculation formula for the forget gate is as follows:

The input gate determines which input information will be incorporated into the processor's state. It regulates how much of the candidate state information at the current timestep should be retained. The input gate evaluates incoming information to decide which parts should be updated and which should be stored, thereby preventing irrelevant information from entering memory. If the input gate outputs a value of 0, it indicates that the corresponding information does not need to be updated; if it outputs a value of 1, the information is fully retained. The specific calculation formulas are provided in Equations (12) and (13):

In the above formula, represents the candidate internal state. are the corresponding weight matrices and  are the corresponding bias vectors.

The output gate determines how much of the cell state will be used as the output of the LSTM neural network, either to the next hidden layer or the output layer. The output gate controls whether information is transmitted, with a value of 0 indicating no output and a value of 1 indicating full output. The specific calculation formula is as follows:

Among them,  are the corresponding weight matrices, and is the bias vector.

The internal state of the LSTM is responsible for linearly passing cyclic information, while it also updates the external state *​*. The state update formula is as follows:

LSTM introduces a gating mechanism that allows the memory cells to retain critical information from earlier timesteps over a certain time interval, thereby capturing long-range dependencies [4].

**Section 3 Model evaluation indicators.**

The battery SOH time-series prediction experiment uses the Mean Absolute Error (MAE), Mean Squared Error (MSE), and the R² value as evaluation metrics for the model [5].

（1）Mean Absolute Error (MAE): MAE is the average of the absolute differences between the predicted values and the true values. It measures the average magnitude of errors between predicted and actual values, with smaller values indicating better model performance. The formula is as follows:

（2）Mean Squared Error (MSE): MSE is the average of the squared differences between the predicted values and the true values. It measures the average squared error between predicted and actual values, with smaller values indicating better model performance. The formula is as follows:

（3）R² Value: The R² value is used to describe the degree to which a regression model fits the data. It reflects the correlation between the model's predicted values and the true values. The value ranges from 0 to 1, with values closer to 1 indicating better model performance and values closer to 0 indicating poorer performance. The formula is as follows

Where represents the true values, denotes the model's predicted values, is the mean of the true values and n represents the number of samples.


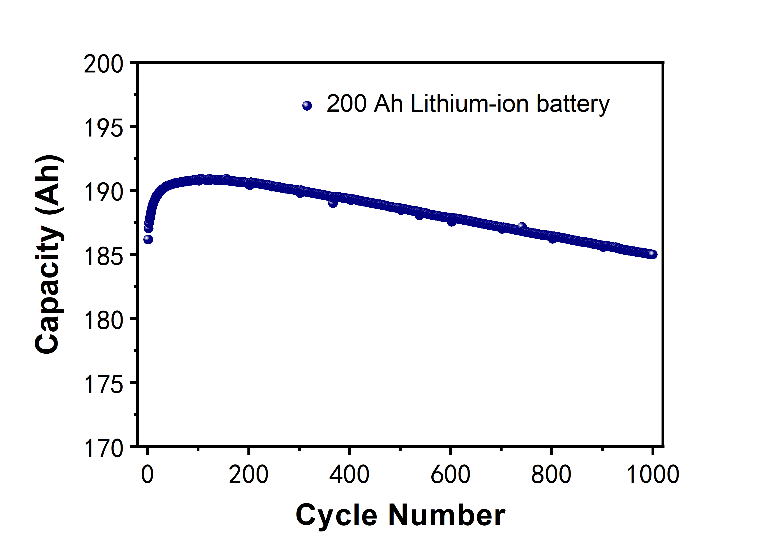


Figure S1 200Ah battery cell cycle capacity decay.

References

[1] Jaeyeong Kim, Dongho Han, Pyeong-Yeon Lee, et al. Transfer learning applying electrochemical degradation indicator combined with long short-term memory network for flexible battery state-of-health estimation[J]. eTransportation, 2023, 18, 100293.

[2] Meifen Wu, Ruyin Long, Feiyu Chen, et al. Spatio-temporal difference analysis in climate change topics and sentiment orientation: Based on LDA and BiLSTM model[J]. Resources, Conservation and Recycling, 2023, 188, 106697.

[3] Ke Li, Yuchen Mu, Fan Yang, et al. A novel short-term multi-energy load forecasting method for integrated energy system based on feature separation-fusion technology and improved CNN[J]. Applied Energy, 2023, 351, 121823.

[4] N. Mert Vural, Fatih Ilhan, Selim F. Yilmaz, et al. Achieving Online Regression Performance of LSTMs With Simple RNNs[J]. IEEE Transactions on Neural Networks and Learning Systems, 2021, 17: 7632-7643.

[5] Wen Yu, Jesus Gonzalez, Xiaoou Li. Fast Training of Deep LSTM Networks with Guaranteed Stability for Nonlinear System Modeling[J]. Neurocomputing, 2021, 422: 85-94.
